# Supplementary material for: Ultralong-Time Recovery and Low-Voltage Electroporation for Biological Cell Monitoring Enabled by a Microsized Multipulse Framework
Source: PubMed Central journal article supplement — ACS Omega. 2021 Dec 13;6(51):35325–33. doi: 10.1021/acsomega.1c04257 (PMC8717367; doi:10.1021/acsomega.1c04257), 2021-12-13
Supplement: ao1c04257_si_001.pdf [file ao1c04257_si_001.pdf]

## Supporting Information

### **Ultralong-time recovery and low-voltage electroporation for biological cell monitoring enabled by a microsized multi-pulse framework**

*Denise Lee, Sophia Shuwn-Yi Chan, Nemanja Aksic, Natasa Bajalovic\*, Desmond K. Loke\**

Denise Lee, Sophia Shuwn-Yi Chan, Nemanja Aksic

Department of Science, Mathematics and Technology, Singapore University of Technology and Design, Singapore 487372, Singapore

Dr. Natasa Bajalovic

Department of Science, Mathematics and Technology, Singapore University of Technology and Design, Singapore 487372, Singapore

Email: [natasa\\_bajalovic@sutd.edu.sg](mailto:natasa_bajalovic@sutd.edu.sg)

Dr. Desmond K. Loke

Department of Science, Mathematics and Technology, Singapore University of Technology and Design, Singapore 487372, Singapore

Office of Innovation, Changi General Hospital, Singapore, Singapore

Email: [desmond\\_loke@sutd.edu.sg](mailto:desmond_loke@sutd.edu.sg)

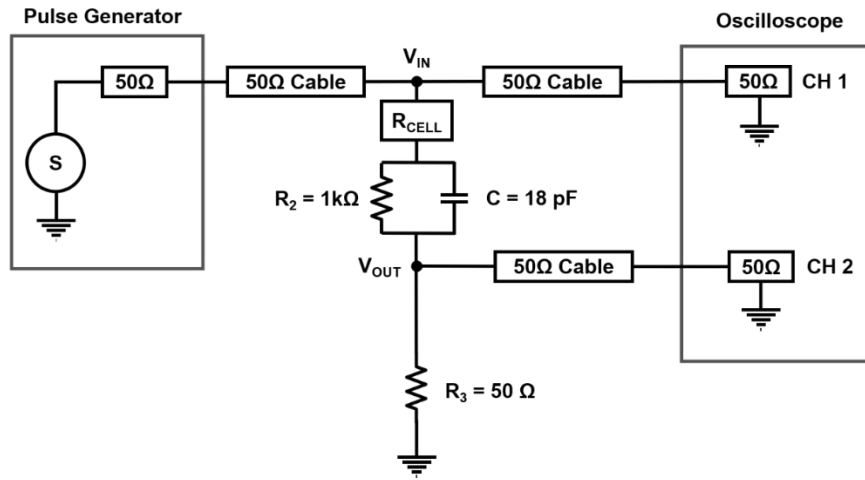

**Figure S1.** Schematic of testing setup for cell electroporation.

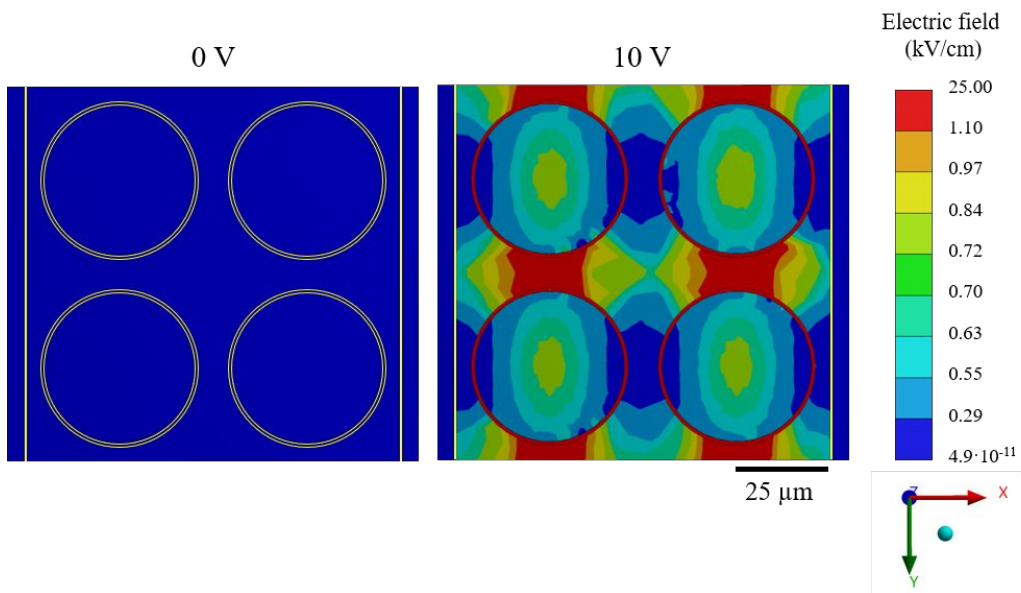

**Figure S2.** Electric field distribution of four cells with no excitation (left panel) and with  $\sim 10$  V rectangular-pulse excitation (right panel). The simulation was performed with a  $\sim 10$  V,  $\sim 1$   $\mu$ s square-wave single-pulse.

**Table S1.** Parameters used for finite element simulations.

| <b>Parameters</b>    | <b>Values</b>              |
|----------------------|----------------------------|
| Conductivity of ITO  | $1.3 \times 10^4$ S/cm     |
| Conductivity of cell | $4.44 \times 10^{-3}$ S/cm |
| Size of gap          | 0.1 mm                     |
| Voltage              | 10 V                       |

**Table S2.** Raw impedance values of MCF-7 cells over a period of 0 – 120 min with different number of bias-voltage pulses.

| <b>Number of pulses</b> | <b>Measured impedance over time (<math>\Omega</math>)</b> |              |               |               |               |                |
|-------------------------|-----------------------------------------------------------|--------------|---------------|---------------|---------------|----------------|
|                         | <b>0 min</b>                                              | <b>5 min</b> | <b>10 min</b> | <b>15 min</b> | <b>60 min</b> | <b>120 min</b> |
| <b>0</b>                | 1.33E+03                                                  | 1.18E+03     | 1.12E+03      | 1.04E+03      | 9.77E+02      | 7.69E+02       |
| <b>10</b>               | 1.31E+03                                                  | 1.17E+03     | 1.10E+03      | 1.00E+03      | 7.78E+02      | 7.13E+02       |
| <b>50</b>               | 1.31E+03                                                  | 1.20E+03     | 1.17E+03      | 1.09E+03      | 9.51E+02      | 8.13E+02       |
| <b>100</b>              | 1.31E+03                                                  | 1.17E+03     | 1.17E+03      | 1.14E+03      | 1.07E+03      | 1.02E+03       |
| <b>150</b>              | 1.29E+03                                                  | 1.26E+03     | 1.26E+03      | 1.26E+03      | 1.26E+03      | 1.19E+03       |
| <b>200</b>              | 1.33E+03                                                  | 1.26E+03     | 1.31E+03      | 1.28E+03      | 1.31E+03      | 1.30E+03       |

**Table S3.** Comparison of state-of-the-art electroporation systems.

| Paper                                                                    | Cell type                          | Type of electroporation | Pulse number                             | Pulse width                           | Gap distance      | Field strength               | Time of recovery |
|--------------------------------------------------------------------------|------------------------------------|-------------------------|------------------------------------------|---------------------------------------|-------------------|------------------------------|------------------|
| <i>Int. J. Cancer</i> <b>121</b> , 675–682 (2007) <sup>69</sup>          | 4T1 cells                          | Cell population         | 80 at 1 Hz                               | 100 $\mu$ s                           | 4 mm              | 600 V/cm, 700 V/cm           | No info          |
| <i>Biophys. J.</i> <b>84</b> , 2709–2714 (2003) <sup>51</sup>            | Jurkat cells                       | Cell population         | 1                                        | 60 ns, 300 ns, 10 ms, and 100 ms      | 0.33 mm           | 3–150 kV/cm                  | No info          |
| <i>PLoS One</i> <b>7</b> , e51349 (2012) <sup>70</sup>                   | N1-S1 cells                        | Cell population         | 1                                        | 600 ns – 15 ns or 150 ns rise time    | 10 mm             | 0-80 kV/cm                   | No info          |
| <i>Bioelectromagnetics</i> <b>33</b> , 257–264 (2012) <sup>71</sup>      | Human Jurkat T lymphocytes         | Cell population         | 5 for 100 $\mu$ s and 10 for 30 ns, 4 Hz | 100 $\mu$ s, 30 ns                    | 1 mm              | 0.5 MV/cm<br>2.5 MV/cm       | No info          |
| <i>Cancer Res.</i> <b>72</b> , 1336–1341 (2012) <sup>72</sup>            | DC-3F, K-562, Lewis Lung Carcinoma | Cell population         | 8 at 1 Hz                                | 99 $\mu$ s                            | 4 mm              | 1.2 – 1.4 kV/cm              | No info          |
| <i>Int. J. Cancer</i> <b>121</b> , 675–682 (2007) <sup>73</sup>          | Jurkat and RPMI 8226 cells         | Cell population         | 200, 300 or 500, 20 Hz                   | 20 ns                                 | 1 mm              | 35 kV/cm                     | No info          |
| <i>Bioelectrochem</i> <b>57</b> , 167–172 (2002) <sup>74</sup>           | DC3F cells                         | Cell population         | 1, 10, 1000, 2500                        | 100 $\mu$ s, 30 $\mu$ s               | 2 mm              | -                            | No info          |
| <i>Technol. Cancer Res. Treat.</i> <b>17</b> , 1–15 (2018) <sup>55</sup> | CHO-K1 cells                       | Cell population         | 1                                        | 10 $\mu$ s, 100 $\mu$ s, 1000 $\mu$ s | 2, 4, 6, and 8 mm | 170, 250, 320, and 400 kV/m  | No info          |
| <i>J. Membr. Biol.</i> <b>245</b> , 617–624 (2012) <sup>49</sup>         | C2C12 and HEK 293 cells            | Cell population         | 8                                        | 100 $\mu$ s                           | 0.150 mm          | 1.2, 1.6, 2 and 2.2 kV/cm    | 30 min           |
| <b>This work</b>                                                         | <b>MCF-7 cells</b>                 | <b>Cell population</b>  | <b>10, 50, 100, 150 and 200 pulses</b>   | <b>1 <math>\mu</math>s</b>            | <b>0.1 mm</b>     | <b>250, 350 and 500 V/cm</b> | <b>120 min</b>   |

**Table S4.** Raw impedance values of MCF-7 cells when electroporated using 200 pulses with different voltage amplitudes.

| <b>Bias voltage (V)</b> | <b>Measured impedance (<math>\Omega</math>)</b> |
|-------------------------|-------------------------------------------------|
| <b>0</b>                | 2.65E+03                                        |
| <b>2.5</b>              | 1.62E+03                                        |
| <b>3.5</b>              | 2.11E+03                                        |
| <b>5.0</b>              | 1.64E+03                                        |
